# Supplementary material for: An Improved Bingham Model and the Parameter Identification of Coal (Rock) Containing Water Based on the Fractional Calculus Theory
Source: Hindawi journal article supplement (doi:10.1155/2021/1996142), 2021-01-01
Supplement: f1 [file 1996142.f1.docx]

| experimental date | | | | | | | | | |
| --- | --- | --- | --- | --- | --- | --- | --- | --- | --- |
| moisture content 0% | | moisture content 0.71% | | moisture content 1.45% | | moisture content 1.83% | | moisture content 3.67% | |
| t/h | strain | t/h | strain | t/h | strain | t/h | strain | t/h | strain |
| 0.3705 | 0.0096882 | 0.4134 | 0.0240797 | 0.4704 | 0.0329201 | 0.2121 | 0.0438075 | 0.3703 | 0.0525596 |
| 0.496 | 0.0134156 | 0.6348 | 0.029315 | 0.5591 | 0.0367601 | 0.3933 | 0.0466731 | 0.4191 | 0.0552407 |
| 0.496 | 0.0164978 | 1.3321 | 0.0356607 | 0.9046 | 0.0384503 | 0.7556 | 0.0485734 | 0.4191 | 0.0586531 |
| 0.496 | 0.0201239 | 2.44 | 0.0404114 | 1.4722 | 0.0421967 | 1.5707 | 0.0531584 | 0.8094 | 0.0609931 |
| 1.5394 | 0.0208491 | 3.2544 | 0.0439036 | 2.2564 | 0.0473725 | 2.3557 | 0.0561446 | 1.4437 | 0.0621143 |
| 2.0838 | 0.0229341 | 4.8752 | 0.0459415 | 3.7012 | 0.0501249 | 2.9595 | 0.0572004 | 2.2244 | 0.0647467 |
| 2.3267 | 0.0238642 | 6.033 | 0.0482615 | 4.8627 | 0.0534671 | 3.8082 | 0.0595954 | 3.3466 | 0.0672329 |
| 3.6815 | 0.0257682 | 6.9319 | 0.0500627 | 6.1109 | 0.0555753 | 4.5931 | 0.0611941 | 4.2248 | 0.0695241 |
| 5.118 | 0.0277871 | 8.4007 | 0.0520986 | 7.2106 | 0.0581587 | 5.7404 | 0.0631246 | 5.5422 | 0.0713766 |
| 6.212 | 0.0293245 | 9.4744 | 0.0535869 | 8.5182 | 0.0597918 | 7.099 | 0.0650551 | 7.1616 | 0.0731503 |
| 7.1132 | 0.0305911 | 16.7784 | 0.0585148 | 9.7962 | 0.0606826 | 8.2797 | 0.0673867 | 8.3326 | 0.0742228 |
| 7.9912 | 0.0327031 | 23.8237 | 0.0617172 | 16.725 | 0.0650907 | 9.6986 | 0.0692267 | 9.8451 | 0.0753927 |
| 9.4429 | 0.0338816 | 30.8401 | 0.0637656 | 23.828 | 0.0686539 | 16.6162 | 0.0745733 | 16.5295 | 0.0801701 |
| 7.1132 | 0.0305911 | 38.0103 | 0.0654792 | 31.0499 | 0.0727813 | 24.0733 | 0.0784343 | 23.8482 | 0.0850937 |
| 7.9912 | 0.0327031 | 45.2444 | 0.0672081 | 38.1618 | 0.0762414 | 30.9944 | 0.0835463 | 30.8832 | 0.0950091 |
| 9.4429 | 0.0338816 | 52.5051 | 0.0693163 | 45.2648 | 0.0792702 | 38.2704 | 0.0885234 | 38.0613 | 0.1056574 |
| 16.5653 | 0.0377343 | 59.6659 | 0.0709319 | 52.4181 | 0.0823204 | 45.3425 | 0.0922465 | 45.3376 | 0.1224513 |
| 23.7785 | 0.0396833 | 66.8146 | 0.0729326 | 59.6606 | 0.0857585 |  |  | 48.8018 | 0.1317136 |
| 30.9009 | 0.0409978 | 74.0459 | 0.0749564 | 66.95 | 0.0892188 |  |  |  |  |
| 38.1594 | 0.0416323 | 81.1939 | 0.0764812 | 73.9855 | 0.0929146 |  |  |  |  |
| 45.3082 | 0.0422573 | 88.3547 | 0.0784141 | 81.155 | 0.1002966 |  |  |  |  |
| 52.3906 | 0.0428765 | 95.4937 | 0.0803412 | 88.4066 | 0.1085218 |  |  |  |  |
| 59.4547 | 0.0428765 | 102.7428 | 0.0839906 |  |  |  |  |  |  |
| 66.8493 | 0.0439167 | 109.7881 | 0.0869045 |  |  |  |  |  |  |
| 73.9148 | 0.0449107 | 117.0473 | 0.0909845 |  |  |  |  |  |  |
| 81.042 | 0.0459134 | 124.1836 | 0.0999401 |  |  |  |  |  |  |
| 88.2715 | 0.0469305 | 131.3495 | 0.111555 |  |  |  |  |  |  |
| 95.5204 | 0.0489933 |  |  |  |  |  |  |  |  |
| 102.6435 | 0.0510203 |  |  |  |  |  |  |  |  |
| 109.7841 | 0.0536761 |  |  |  |  |  |  |  |  |
| 116.8611 | 0.0571662 |  |  |  |  |  |  |  |  |
| 124.137 | 0.0607544 |  |  |  |  |  |  |  |  |
| 131.2105 | 0.0660675 |  |  |  |  |  |  |  |  |

The original data involved in this paper are shown in the following table.
